1                                    **Antibodies to SARS/CoV-2 in arbitrarily-selected Atlanta residents**

2

3                                    Jun Zou<sup>#</sup>, Alexis Bretin<sup>#</sup>, & Andrew T. Gewirtz

4                                    Center for Inflammation, Immunity and Infection, Institute for Biomedical Sciences, Georgia  
5                                    State University, Atlanta, GA, USA

6  
7

8

9                                    **Key Words:** ELISA, IgG, IgM, Spike protein

10  
11  
12  
13  
14  
15

16                                    **Corresponding Author:**  
17                                    Andrew Gewirtz, PhD  
18                                    Institute for Biomedical Sciences  
19                                    Georgia State University  
20                                    Atlanta, GA 30303  
21                                    E-mail: [agewirtz@gsu.edu](mailto:agewirtz@gsu.edu)  
22                                    Phone: 404-413-3589

23  
24  
25  
26  
27

28                                    <sup>#</sup> Equal Contribution

29  
30  
31  
32  
33  
34  
35

36

37 **Abstract**

38 We quantitated anti-SARS/CoV-2 IgG and IgM by ELISA in self-collected blood samples  
39 (n=142) in arbitrarily-selected metro Atlanta residents, primarily acquaintances of the authors'  
40 lab members from 4/17-4/27, 2020. Archived serum (n=34), serum from nucleic acid test (NAT)-  
41 positive subjects (n=4), and samples collected from NAT-positive community members (n=4)  
42 served to validate the assay. The range of anti-SARS/CoV-2 antibodies in archived and NAT-  
43 positive sera indicated need to compromise sensitivity or specificity. Accordingly, we set a  
44 cutoff of 4 SD above the mean for IgG and 3 SD above the mean for IgM to indicate that an  
45 individual had been exposed, and developed some degree of immunity, to SARS/CoV-2. The  
46 IgG cutoff clearly compromised sensitivity but offered high specificity, both of which were  
47 harder to gauge for IgM. Based on these cutoffs, excluding subjects whose participation resulted  
48 from self-suspected SARS/CoV-2 infection, we found 7.1% positivity for anti-SARS/CoV-2 IgG  
49 (3 of 127 subjects) or IgM (6 of 127). While we do not claim this small immune survey is  
50 broadly representative of metro Atlanta, and we have greater confidence in the IgG results,  
51 which had only 2.4% positivity, it nonetheless demonstrates that persons with antibodies to  
52 SARS/CoV-2, who've not suspected they'd been exposed to this virus, can readily be found in  
53 various Atlanta area neighborhoods (9 positives were in 8 zip codes). Accordingly, these results  
54 support the notion that dissemination of the virus is more widespread than testing would indicate  
55 but also suggests that most persons in metro Atlanta remain vulnerable to this virus. More  
56 generally, these results support the general utility of sero-surveillance to guide public policy but  
57 also highlight the difficulty of discerning if individuals have immunity to SARS/CoV-2.

58

59 **Introduction**

60 There is now a wide interest in measuring SARS-CoV-2 antibodies both as a means of gauging  
61 the true extent to which persons within a particular geographic region have been infected by this  
62 virus and perhaps as a means of discerning whether individuals might now be immune from  
63 SARS/CoV-2-induced disease. To address the former, some have begun conducting “sero-  
64 surveys”. One recently publicly-posted study described use of a lateral flow test, which purports  
65 to give a qualitative yes or no for presence of absence of such antibodies and observed that 4.3 %  
66 of tested resident of Santa Clara CA had been exposed to the virus [1]. Press releases of other  
67 studies that did not give details of their methodology observed presence of SARS-CoV-2  
68 antibodies in 14.3% of resident in Heinsberg, Germany and 18% of residents in New York State.  
69 Herein, we report results of our effort to measure SARS/CoV-2 antibodies in resident of  
70 metropolitan Atlanta, GA. We analyzed self-collected blood samples from acquaintances of the  
71 authors’ lab members by a quantitative lab-based ELISA method. We found that antibodies to  
72 SARS/CoV-2 are not merely a yes or no but have a broad quantitative range, with some overlap  
73 when comparing samples from confirmed infected subjects versus samples collected before the  
74 advent of SARS-CoV-2. Nonetheless, our quantitative approaches enabled seemingly readily and  
75 reliable discernment that about 3 and 6 of 127 arbitrarily subjected Atlanta area residents  
76 displayed SARs/CoV-2-specific IgG and IgM, respectively, which likely reflects that they have  
77 been exposed to this virus.

78

79

## 80 **Methods**

81 All procedures received required approvals by Georgia State University's Institutional Review  
82 Board and/or Biosafety committee.

83

84 **Subject selection:** An advertisement was prepared that explained that the goal of the study was  
85 to perform community by sero-surveillance, and specified that no results would be provided to  
86 individual participants. The advertisement was circulated by the authors and their lab members in  
87 their neighborhoods (see table 1 for subject zip codes), which resulted in enrollment of 142  
88 individuals, 135 of whom had not been tested for SARS/CoV-2 and 2 individuals whom had  
89 suspected they'd been infected but tested negative at an area hospital. While these subjects were  
90 not asked any health-related questions, some volunteered that they suspected they might have  
91 been previously infected, which we noted. Additionally, we enrolled 4 community members  
92 whom had been referred to the study by word of mouth primarily because they had been deemed  
93 positive for SARS/CoV-2 by a PCR-based test. One of these subjects recruited 5 household  
94 members, one of whom exhibited symptoms. We also enrolled 4 subjects who had not been  
95 tested for SARS/CoV-2 but yet were referred to the study because they had told associates of the  
96 study team that they believed they had been infected by SARS/CoV-2. Additionally, 3 serum  
97 samples from NAT-positive subjects were provided by Sean Stowell (Emory University) and one  
98 was provided by Mount Sinai School of Medicine Department of Pathology.

99

100 **Blood collection and serum isolation:** Subjects were provided an autoclaved 1.5 ml Eppendorf  
101 tube, 2 26-gauge safety lancets, and asked to watch a video demonstrating collection of 1-2

102 blood droplets <https://www.youtube.com/watch?v=H9e-9xvhrms>. Subjects were advised to then  
103 collect their blood and contact study team. This procedure generally resulted in blood being  
104 centrifuged (5000 rpm, 10 minutes) and serum isolated in a biosafety cabinet at GSU within 24  
105 hours of blood collection, although test comparisons of allowing storing blood for up to 3 days  
106 did not seem to impact results. This procedure yielded over 5 and 10 microliters of serum,  
107 respectively in over 97% and 93% of subjects respectively. Serum was then heated, in sealed  
108 Eppendorf tubes, to 55°C for 15 minutes to reduce its infective potential. Archived control sera  
109 consisted of samples collected from healthy control subjects in the Atlanta area from 2015-2019  
110 that had been stored at -80°C. Such sera was heat-inactivated as above prior to use in this study.

111  
112 **ELISA** (Based on protocols from Krammer and colleagues [2])  
113 Recombinant his-tagged S1 SARS/CoV-2 S1 Spike protein, purchased from Sino Biologicals  
114 (Wayne PA), was diluted to a concentration of 1 µg/ml in PBS and applied overnight, 100 µl per  
115 well, to Ni-coated 96-well plates (Fisher/Thermo) at 4 °C. Plates were then blocked with PBS/  
116 5% skim milk for 1h at room temperature, washed 3X with PBST (PBS 0.1% tween 20). Serum,  
117 sequentially diluted 1:100 in PBS/1% BSA and 1: 10 in 3% skim milk respectively, was then  
118 applied to wells for 1h at 37 °C. Plates were then washed 3X with PBST and then incubated with  
119 antihuman IgG or IgM (KPL), which was diluted 1:5000 and 1:50,000 respectively. 45 min  
120 later, plates were washed 3X with PBST and developed with TMB for 10 minutes at which time  
121 reaction was stopped with stop reagent (KPL, TMB Stop solution) and OD450 nm measured by  
122 a 96-well plate reader (subtracting readings at 540 nm). A positive control for the assay was used  
123 to assess and correct for plate to plate variance of the assay. In the course, of setting and  
124 validating this assay, many samples were assayed multiple times and gave similar relative

125 patterns of results although absolute OD varied between assays run on different days. Hence, all  
126 data reported herein results from all samples being assayed together.

127

128

129

130 **Results**

131           Some of the archived serum samples, which were collected well before SARS/CoV-2 is  
132 thought to have existed, displayed modest but measurable immune reactivity to recombinant  
133 SARS/CoV-2 S1 spike protein (Figure 1), likely reflecting non-specific binding or cross-  
134 reactivity to other Coronavirus spike proteins. In any case, we presumed that any newly collected  
135 serum samples displaying immune reactivity to SARS/CoV-2 spike protein above the range of  
136 the archived samples likely reflects that an individual has been exposed to SARS/CoV-2.  
137 Conversely, test samples having values within the range of the archived samples reflects an  
138 individual's lack of exposure to SARS/CoV-2 or that the antibody response an individual  
139 generated at the time of blood collection was not sufficient to rise above the range of the  
140 archived samples. Indeed, one study reported that 30% of hospitalized subjects don't make  
141 antibodies to the virus [3]. For example, one of the 4 hospital-provided NAT+ serum samples  
142 yielded an OD within the range of the control samples. Hence, we concluded that setting a  
143 specific cut-off to declare samples SARS/CoV-2 positive or negative will require compromising  
144 sensitivity or specificity. Accordingly, as all archived sample fell within 2.6 SD of the group  
145 mean, we set a cut-off of 4 SD above that mean as a threshold to indicate that an individual had  
146 likely been exposed to SARS/CoV-2. If values had a normal distribution, such a cut-off would  
147 provide over 99% specificity. This cut-off result was met by 3 of 4 community-collected NAT+  
148 samples. The IgM assay was harder to validate in that, as one might expect, the 4 hospital-  
149 provided convalescent serum samples were all within the range of the archived samples. Hence,  
150 based on overall analysis of our data and other studies, we set a cutoff of 3 SD to indicate likely  
151 recent exposure to SARS/CoV-2. Based on this cutoff, 2 of our 4 community-acquired NAT+  
152 samples, including the one that was negative for IgG, were positive for SARS/CoV-2 anti-IgM.

153 Thus, all 4 community-collected subjects whom reported NAT+ to us exhibited anti-SARS/CoV-  
154 2 IgG or IgM.

155           Based on the above-defined cutoffs, 7 of all 142 community-collected samples we  
156 collected in this study were positive for SARS/CoV-2 IgG. Yet, the level of SARS/CoV-2 IgG  
157 in all of these samples was dramatically lower than the 2 high-titer hospital-provided positive  
158 control samples. We speculate that severe SARS/CoV-2 infections may result in viremia that  
159 drives very high antibody responses whereas cases not requiring hospitalization result in more  
160 subtle and/or delayed antibody responses. Accordingly, none of the blood samples we tested  
161 (n=20), including 2 IgG+ and 2 IgM+ subjects, showed detectable virus in blood by PCR. Of the  
162 7 IgG+ samples we collected from the community, 3 were from NAT+ subjects and one was a  
163 household member of one of those subject. This latter sample yielded more than double the OD  
164 of the sample provided by the overtly ill NAT+ subject despite the household member lacking  
165 severe symptoms. Several other subjects were included in the study purely due to having  
166 contacted the study team after having heard of the study second hand. Excluding both groups,  
167 results in 3 of 127 subjects that were selected based only on acquaintance to the study team as  
168 being IgG+. These positives were from 3 different zip codes (Table 1) and had no apparent  
169 connection to each other and never displayed symptoms, and hence can be viewed as unbiasedly  
170 selected to have participated in the study. Analogously, for IgM, 8 of 142 were positive of which  
171 2 were previously found to be NAT+. Of the 127 unbiasedly-selected participants, 6 were  
172 positive, all from different zip codes. These studies support the notion that dissemination of  
173 SARS/CoV-2 is greater than confirmed testing would indicate and highlight importance of broad  
174 randomized testing for past and present indicators of the virus.

175



176 **Discussion**

177           Determining the extent to which SARS/CoV-2 has disseminated within a particular  
178 geographic region is critical to understanding its virulence and the degree to which the  
179 community has acquired some degree of immunity to it. While testing for SARS/CoV-2, which  
180 has largely focused on those with symptoms and, as of April 27, 2020, confirmed the presence of  
181 the virus in about 0.23% of the population, true incidence of exposure is presumed to be much  
182 higher. In accord with this notion, we found that 7.1% of those we arbitrarily-selected, we submit  
183 unbiasedly, displayed levels of anti-SARS/CoV-2 antibodies that indicated likely exposure to the  
184 virus. It is difficult to determine the extent to which our survey is representative of metro  
185 Atlanta in general or even those areas that are most represented. We certainly would not claim  
186 that our selection of participants was random but yet we submit our arbitrary selection process  
187 had minimal bias in terms of whether persons suspected they'd been infected and largely resulted  
188 in inclusion of households that would not have likely had close contact in 2020. But on the other  
189 hand, our survey participants were heavily weighted toward northeast Atlanta neighborhoods and  
190 surely under-represents African Americans and Latinos, whom are thought to be most likely to  
191 be exposed to the virus. Nonetheless, that our small survey identified SARS/CoV-2 antibody-  
192 positive in subjects whom were Caucasian, African Americans, Latinos, and Asian Americans  
193 suggesting the virus has broadly disseminated in the region. The modest numbers of African  
194 Americans and Latinos included make it difficult to weight or extrapolate our results but yet  
195 attempting to so would lead us to guess that applying our methodology broadly and randomly  
196 across the region would yield higher rates of SARS/CoV-2 antibody positivity than observed in  
197 our study.  
198

199           The rate of SARS/CoV-2 antibody positivity we observed is greater than the 2.4%  
200   observed in Santa Clara SC in early April and is considerably lower than that recently measured  
201   in NY. Yet, aside from our study being smaller and not having attempted random sampling, our  
202   quantitative methodology may have allowed us to detect weak but nonetheless real positives that  
203   would seem to be extremely difficult to detect by lateral flow without also picking up many false  
204   positives. Considering this presumed methodological difference (to our knowledge methods  
205   used by NY State have not been reported in detail) and that the per capita death rate in New York  
206   State is over 10 times that of Georgia, we speculate that applying our methodology to NY would  
207   reveal higher rates of exposure than they observed by their methodology. Yet, one can readily  
208   imagine alternative explanations. For example, perhaps sequence variants of SARS/CoV-2  
209   predominating Atlanta are less virulent than those in NY. Perhaps the lower population  
210   density and relatively low use of public transportation in Atlanta resulted in exposures to lower  
211   doses of the virus.

212           During the course of our study, about 15 participants expressed the view that they  
213   strongly suspected they had been exposed to SARS/CoV-2 based on symptom; about 10 of our  
214   unbiasedly selected subjects and 5 others who contacted us based on their symptoms. Only one  
215   of these subjects displayed SARS/CoV-2 antibodies (IgM) thus indicating the difficulty of  
216   diagnosing by symptoms. Conversely, none of the 3 IgG+ positive subjects we unbiasedly  
217   identified displayed any symptoms, cautioning against presuming healthy people are not  
218   infected. Yet, that all 3 had household members lack SARS/CoV-2 antibodies fits with the notion  
219   that such individual are not “super spreaders” of the virus. In conclusion, we readily  
220   acknowledge our study faced a variety of limitations, as one might expect would be the case  
221   when a small team of mouse-based researchers seek to originate a clinical study in the course of

222 a pandemic. Nonetheless, we believe our results can inform approaches to sero-surveil  
223 communities to better manage the pandemic.

224

## 225 References

226

- 227 1. Bendavid, E., et al., *COVID-19 Antibody Seroprevalence in Santa Clara County, California*. MedRxiv, 2020. <https://doi.org/10.1101/2020.04.14.20062463>.
- 228 2. Stadlbauer, D., et al., *SARS-CoV-2 Seroconversion in Humans: A Detailed Protocol for a Serological Assay, Antigen Production, and Test Setup*. Curr Protoc Microbiol, 2020.  
229 57(1): p. e100.
- 230 3. Wu, F., et al., *Neutralizing antibody responses to SARS-CoV-2 in a COVID-19 reCoVered*  
231 2 patient cohort and their implications. MedRxiv, 2020.  
232 <https://doi.org/10.1101/2020.03.30.20047365>.

233

234

235

236

237

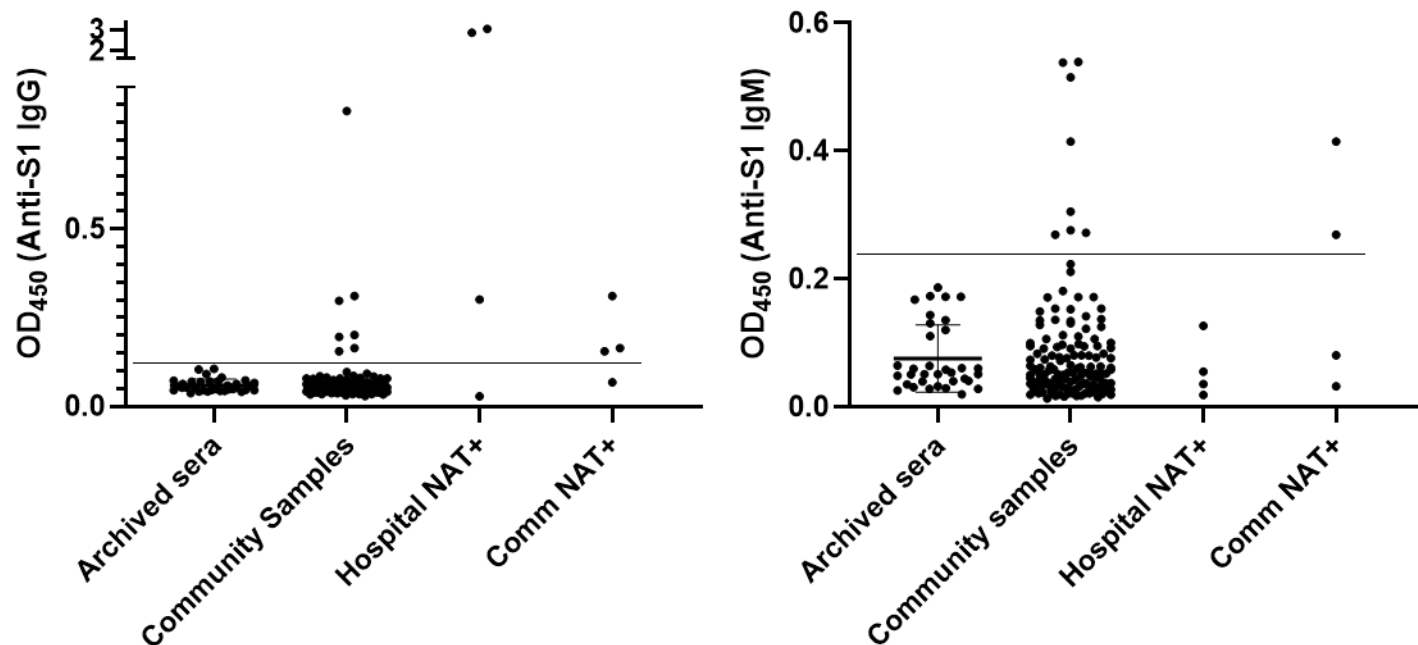

Figure 1. SARS/Cov-2 antibody levels by ELISA. Data generated as described in text. Horizontal line indicates the 4 and 3 SD above the mean cutoff used for IgG and IgM.

238 **Table 1. Zip codes of SARS/CoV-2 antibody testing.**

239 Zip code, number of subjects tested, IgG+, and IgM+. Highlighted values refer to the positive

240 tests from persons whose selection was not based on suspected positivity.

| zip   | tested | IgG | IgM |
|-------|--------|-----|-----|
| 30030 | 10     | 0   | 0   |
| 30033 | 32     | 1   | 1   |
| 30038 | 8      | 2   | 0   |
| 30041 | 1      | 0   | 0   |
| 30075 | 13     | 0   | 1   |
| 30094 | 2      | 0   | 1   |
| 30096 | 1      | 0   | 0   |
| 30097 | 1      | 0   | 0   |
| 30135 | 4      | 1   | 0   |
| 30188 | 5      | 0   | 1   |
| 30189 | 3      | 0   | 0   |
| 30303 | 1      | 0   | 0   |
| 30305 | 3      | 1   | 1   |
| 30307 | 15     | 0   | 1   |
| 30308 | 6      | 1   | 0   |
| 30309 | 1      | 0   | 1   |
| 30312 | 3      | 0   | 0   |
| 30316 | 1      | 0   | 0   |
| 30317 | 6      | 1   | 1   |
| 30318 | 1      | 0   | 0   |
| 30319 | 3      | 0   | 0   |
| 30324 | 3      | 0   | 0   |
| 30327 | 4      | 0   | 0   |
| 30328 | 2      | 0   | 0   |
| 30329 | 4      | 0   | 0   |
| 30339 | 1      | 0   | 0   |
| 30340 | 1      | 0   | 0   |
| 30342 | 2      | 0   | 0   |
| 30344 | 1      | 0   | 0   |
| 30345 | 1      | 0   | 0   |
| 30606 | 2      | 0   | 0   |
| 31302 | 1      | 0   | 0   |

241
